# Supplementary material for: Genome Wide Analysis of Severe Acute Respiratory Syndrome Coronavirus-2 Implicates World-Wide Circulatory Virus Strains Heterogeneity
Source: Preprints.org preprint supplement (doi:10.20944/preprints202004.0137.v1), 2020-04-09
Supplement: Supplementary file 1 [file supplementary]

## Sheet: Supplementary Data 2
		Genome annotation reveals nucleotide deletion and amino-acid substitutions in different strains of SARS-CoV-2: implications for virus origins
M. Rafiul Islam, M. Nazmul Hoque, M. Shaminur Rahman, J. Akter Puspo, Masuda Akther, Salma Akter, A. S. M. Rubayet-Ul-Alam, Munawar Sultana, Keith A. Crandall, M. Anwar Hossain
						Polyprotein				S glycoprotein				Membrane (M) Protein				Envelop (E) protein				Nucleocapsid (N) Protein				ORF3a				ORF 6					ORF7a				ORF7b				ORF8				ORF10
		Saummary of genomic analysis
					Non-strictural protein	Country	Amino acid change (RefPositionStrain)	Total Nucleotide mutations		Country	Amino acid Change(Refpositionstrain)	Total Nucleotide mutations		Country	Amino acid Change(Refpositionstrain)	Total Nucleotide mutations		Country	Amino acid Change(Refpositionstrain)	Total Nucleotide mutations		Country	Amino acid Change(Refpositionstrain)	Total Nucleotide mutations		Country	Amino acid Change(Refpositionstrain)	Total Nucleotide mutations		Country	Amino acid Change(Refpositionstrain)	Total Nucleotide mutations			Country	Amino acid Change(Refpositionstrain)	Total Nucleotide mutations		Country	Amino acid Change(Refpositionstrain)	Total Nucleotide mutations		Country	Amino acid Change(Refpositionstrain)	Total Nucleotide mutations		Country	Amino acid Change(Refpositionstrain)	Total Nucleotide mutations
		Total nucleotide change (deletion and mutations)	1407		nsp1	Japan, Portugal	R24C	655		Japan, Iceland, USA	L5 F	173		Lithuania, Switzerland, Belgium,Portugal, iceland, England, Finland,Italy, Congo,USA	D2G	30		Canada	S6L	25		USA	D3Y	109		Portugal	G49C	64		France	H3Y	8			Iceland	L5P	30		Germany	L32F	9		USA	T11I	19		USA	A8V	16
						Malaysia	H45Y			Hong Kong, Canine	L8 V			Shanghai	S3F			Shanghai	T30I			USA	N4D			Portugal, Denmark, Australia, USA, Congo, Slovakia, Saudi Arabia, France,Iceland, Netherlands,Luxemburg,Germany, Wales, Russia	Q57H			Japan	V5F				Iceland	A13T			Portugal	A15S			USA	S24L			Finland	P10S
		Coding region	1138			Shanghai	G7V			Iceland	L18 F			Turkey	V10A			South_Korea	L37H			Netherlands, USA	Q9H			Iceland,Wales, USA	V13L			USA	V9F				Wales	G26R			USA	C41F			USA	P36S			Japan	T12M
		Non-coding region	269			USA	V23F			Henan	Y28D			Wales	L16F			Shanghai	I46F			Malasysia, USA, Saudi_Arabia, Australia	P13L			Australia	A31T			USA	K42N				Iceland	T28I			Yunnan	I2S			USA,Wales, Shanghi,Vietnam, New_Zealand, Guangzhou	V62L			England	I13M
						USA	G30D			Wuhan	F32V			USA	G25V			Australia	S68F			Portugal	P13S			France	T14I			Wales	E55D				Iceland	V29L							Jingzhou, China	S67F			Belgium	Y14C
		Total amino acid change or substitution	722			Wales	V56I			Wuhan	F32I			Iceland	C33F			Guangdong	S68C			New_Zealand	D22G			Wales	T34M								USA	P34S							USA	S69L			Australia	S23F
						Belgium	L104F			USA, Jiangsu, Sanghai	H49Y			South_Korea	A40S			Spain	P71L			Shanghai	S23P			Netherlands	F8L								Portugal	G38V							Turkey	Q72H			Australia	R24C
		Total missense mutations	410			Iceland	E87D			France, USA	L54F			South_Korea	I52T			Guangdong	D72Y			Netherlands,Iceland	T24N			France	A54V								Iceland	P45L							Netherlands	Y73H			USA	R24L
						New Zealand, USA	D75E			Malysia	H69D			USA	V70I			France	D72G			USA	A35T			Iceland	G11V								Iceland	H47Y							Guangdong	G77C			USA	A28V
						Australia, Canada, Kuwait, Pakistan, Slovakia	R207C			USA	S71F			Shenzhen	G78A			Iceland	L73F			USA	P46S			Cambodia	V88L								Shanghai	F54S							Beijing, USA, Belgium, Yunnan,Shenzhen,Taiwan,Wuhan,China, Guangzhou, South_korea,India,Japan,Australia,Singapore,Shandong,Spain,Portugal,Germaney,Colombia,Chile,New_Zealand,Shanghai,Vietnam,Netherlands,France,Brazil,Tianmen,Hong_Kong,Wales	L84S			Shanghai	T38I
					nsp2	Georgia	E217G			Malysia	S71T			Shanghai	T130P							Australia	E62K			Iceland	K67N								Iceland	T61I							Henan, China	P85S
						Iceland	P193S			Malysia	G72W			England	R158C							Chile, Iceland	D103Y			Wales	H93Y								Shandong	H73Q							Guangdong	L95F
						USA	F190L			Malysia	T73F			Iceland, USA, Belgium, Netherlands, Belgium, France, Finland, England, Switzerland, Scotland, Portugal, Ireland	T175M							Wuhan	W108C			Japan	T89I								Kuwait	V74F							Jingzhou, China	S97N
						USA	D224I			Malysia	N74H			Turkey	A194V							Iceland	P117S			Belgium, Iceland, Luxemburg	A99V								New_Zealand, USA	S81L							USA	H112Q
						USA, Taiwan, Portugal, Netherlands, Luxembourg, Iceland, Germany, France, Finland, Denmark, Belgium	T265I			Sanghai	S98F			Malaysia, Singapure	D209H							Iceland, Netherlands	A119V			Australia, Saudi Arabia	K75E								Shanghai	Q90P							Shanghi, China	V114I
						Australia	N272H			Japan	I119V											Shagdong	L121H			New Zealand	G76S								Shanghai	E92D
						France	P309S			France	V120I											Spain, Portugal,USA	P122L			Netherlands	K61N								Shanghai	V93D
						Iceland	S318L			Hong Kong	D138Y											Iceland	W132Y			Netherlands	S74A								Shanghai	I100F
						USA	H325Y			Iceland	Y145H											Iceland	A134V			Singapore	A59D								USA	I110T
						USA	P309L			USA	H146Y											Shanghai	H145Y			USA	V88A								Spain	L116P
						Wales, USA, Portugal, Netherlands, Iceland, Germany, Australia	G392D			Spain	N148K											USA	I146F			Wales	I62V								Scotland	T120I
						USA	A385V			Spain	N149H											Shenzhen	T148I			Henan	H93Q
						USA, Tawain , Shanghai, Pakistan, Netherlands, Kuwait, Germany, England, Canada, Australia	V378I			China	M153T											Wales	P151L			Netherlands	D155Y
						USA	A354V			USA	F157L											USA	A152S			Sanghai	M125I
						USA, Georgia	H374Y			Iceland	M177I											Netherlands, England	A156S			South Korea	W128L
						Iceland	E352D			Japan, USA	G181V											Iceland	P168S			Guangdong	S166L
						Iceland	T356A			Switzerland	K202N											USA	S183Y			Japan	L140V
						Iceland, Denmark	T346I			France	V213L											Shanghai, USA	R185C			Jiangsu	T176I
						Guangzhou	N389D			South Korea	S221W											Shanghai	S185Y			Japan	G224C
						Australia, Belgium, England, Iceland, Scotland, USA	H417R			Finland , Netherlands	Q239K											Netherlands, Taiwan	S188P			Taiwan	E191G
						Belgium	G408S			Hangzhou, Australia	S247R											Switzerland, Iceland	S188L			Wales	G172C
						France	S428G			Netherlands, Belgium, Germany	S254F											Guangdong	S190G			Portugal	T175I
						Hong Kong	E444K			USA	W258L											Belgium, Shanghai	R191L			Iceland	Y189C
						Iceland, Netherlands	R398C			USA	Q321L											Wales, Malaysia,Shanghai	S193I			USA, Chile, Portugal, France , Spain, Netherlands, Georgia, Brazil	G196V
						USA	S428N			Wales	V341I											China, Canada,Wales, Iceland,USA	S194L			Sanghai	S171L
						USA	R402C			USA	A348T											France	R195K			USA	G224V
						USA	A427V			Shenzhen	N354D											Spain, Portugal, USA,Netherlands,Georgia,Brazil, France,Wales	S197L			Guangdong	T175K
						South Korea	K492T			Shenzhen	D364Y											USA	P199S			USA	Y184H
						India	I476V			Hong Kong, France	V367F											USA	G200S			Taiwan, Portugal , Sanghai, Netherlands, Georgia, Hangzhou, France, Switzerland , Brazil, Spain, Hong Kong,Canada, Finland , England , New Zealand, USA , Wales, Canada , Scotland , Singapore, Sweden, Belgium, South Korea, Australia, Norway, Iceland, Italy, Guangdong	G251V
						Austrlia, Iceland	G519S			Shanghai	K378R											China,USA,Australia	S202N			Shenzhen	E239V
						Iceland	A537T			Guangdong	Q409E											Wales,Spain,USA,Belgium,Ireland,Australia,Hungary,Portugal,Germany,Mexico, England,Iceland,Scotland,Switzerland, Finland, Vietnum, News_Zaeland,Belgium,Vietnum, Australia	R203K			Shenzhen	D250V
						Shanghai	G514R			Finland	A435S											Wales,Spain,USA,Belgium,Ireland,Australia,Hungary,Portugal,Germany,Mexico, England,Iceland,Scotland,Switzerland, Finland, Vietnum, News_Zaeland,Belgium,Vietnum	G204R			USA	G251C
						South Korea	S505F			USA	G476S											Shanghai	T205I			USA	G254R
						USA	A555V			USA	V483A											USA	N213Y			Iceland	L275F
						USA	R560H			France	Y508H											Portugal	A217V			South Korea	V259L
						Iceland	M585V			USA	T547I											USA	S235P			Portugal	S253F
						France	L580F			Shanghai	K558N											Colombia	G238C			China, Hong Kong	T269M
						Kuwait	E658D			Denmark	L611F											Italy	V246I			Iceland	V273L
						Shenzhen	F635S			Czech Republic, Wuhan, USA , Congo, Georgia, Germany, Wales, Ireland, Hungary, Belgium, Portugal, Spain, Japan, Slovakia, South Africa, Iceland, Italy, Scotland, England, France, Mexico, Luxemburg, Switzerland, Portugal, New Zealand, Taiwan, Peru, Denmark, Australia, Finland, Vietnam, Netherlands, Russia, Brazil, Panama	D614G											Wuhan	K249I
						USA	T609I			France	A653V											USA	A252S
						USA	W630R			Georgia	E654Q											Iceland	Q289H
						Shanghai	Q676H			USA	H655Y											Netherlands	I292T
						India	I671T			Scotland, Denmark, Iceland, Norway	Q675H											Iceland	A308S
						France	L681F			Hangzhou	R682Q											USA	G321D
						China	A690V			Shanghai	N703S											Hong_Kong	M322I
						Brazil	T708I			Belgium	A706V											USA	P326L
						Australia	T727I			Hong Kong	T719A											USA	S327L
						Australia, Congo, Iceland, Netherlands, Portugal, Scotland	I739V			France	I720V											Iceland	T334I
						Australia, Congo, Iceland, Netherlands, Portugal, Scotland	P765S			Wuhan	L752F											Netherlands	A336V
						Belgium	G728S			Taiwan	R765L											Netherlands	L339F
						Netherlands	E754D			Neherlands	V772L											Beijing	D343V
						Netherlands	P748S			Germany	E780Q											Shanghai, Japan,Guangdong	P344S
						USA	A735V			Taiwan	T791I											Iceland	V350F
						USA	M789I			Sweden	F797C											Japan	I351V
						USA	P804L			Australia, USA	P809S											Iceland	F363S
						Sweden	G818S			Netherlands	P812S											Hong_Kong	P365S
						Shanghai	P769S			Singapore	F817L											Hong_Kong	P368S
					nsp3	Iceland	I841V			Congo	L821I											Netherlands	K370N
						Iceland	V839L			Iceland	A831V											New_Zealand	D377G
						Wales, USA, Poland, Netherlands, Iceland, Germany, Australia	A876T			Iceland	I834T											Finland	E378Q
						Spain	M902I			Netherlands	D839E											USA	T391I
						Scotland	P885S			Georgia, Portugal, Iceland, England	D839Y											USA	A397S
						Iceland	A903V			Portugal	A845S											Netherlands	D402Y
						Iceland	P892S			Netherlands	A852V											Shanghai,Guangdong	S404A
						France, Shanghai	P971S			Beijing	V860Q											Wales	A414S
						Japan	Q956R			Beijing	L861K											Iceland	Q418H
						Netherlands	L960F			Sanghai	E868K
						New Zealand, USA	P971L			Australia	G889S
						Shandong	L969P			USA	S929I
						South Korea	F941L			India	A930V
						USA	T945I			USA	D936Y
						USA	G993S			Iceland, USA, France, Switzerland	S939F
						USA	Q998H			Australia	S940F
						Chile	A1043V			Belgium	S940T
						Portugal	D1036E			Belgium	T941A
						USA	A1049V			Belgium	S943P
						USA	E1047D			Shanghai	L948R
						USA	K1124E			Shanghai	V952F
						USA	L1110F			Spain	Q954K
						USA	P1158L			Beijing	F970S
						Shenzhen	D1179A			China	V1040F
						Jiangsu	T1168I			Japan	P1079T
						Japan	A1176V			Japan	K1086R
						Iceland	S1189G			Congo	V1122L
						France	G1155C			Shenzhen	V1129L
						Australia	A1156V			France	I1132V
						France	T1241I			Australia, France	P1143L
						Hangzhou, Shanghai	P1207H			China	D1146E
						Japan	K1197E			France	P1162A
						Jiangsu	V1199I			Shanghai	P1162L
						USA	K1230N			Henan	S1170Y
						USA	K1202N			Iceland	S1170P
						Portugal	G1261D			Ecuador	E1207V
						Japan	G1288S			Netherlands	Y1209H
						Iceland, Denmark	T1246I			Shanghai	I1216T
						Iceland	I1286M			Japan	V1228L
						Japan	M1312I			Iceland	M1229I
						Japan	A1298V			USA, Netherlands, Portugal	M1237I
						USA	N1324S			Wales, USA	C1247F
						Shanghai	S1400P			Australia	C1254F
						Luxembourg	A1352V			Shenzhen	E1262G
						Shanghai	T1444I			Iceland, England, Henan	P1263L
						Shanghai	T1429A			Spain	L1265P
						USA	K1410R			Netherlands	T1273I
						USA	A1420T
						USA	P1497L
						USA	P1497S
						USA	A1473V
						USA	I1505T
						Shenzhen	E1460G
						Shenzhen	R1464P
						Shenzhen	G1488V
						Shenzhen	S1492P
						Shanghai, Germany	R1464W
						USA	P1596L
						USA, Shanghai, Canada	I1607V
						South Korea, Beijing	L1599F
						Russia	N1576T
						Australia	T1653I
						Iceland	T1626I
						USA	P1640L
						Scotland	P1692L
						France	A1698S
						Belgium	I1686K
						USA	M1769I
						Wuhan	V1798I
						USA	K1817N
						USA	P1786L
						Iceland, Belgium	T1822I
						Iceland	P1811S
						USA	T1840I
					nsp4	Japan, USA	K1860N
						Iceland	S1872N
						USA	S1924G
						Shanghai	P1921S
						Netherlands, South Korea	A1997V
						USA	T2016K
						USA	T2007I
						USA, Iceland	P2018S
						Shenzhen	S2015G
						Shanghai	A2033V
						Saudi arabia, Malaysia, Australia	T2016K
						Malaysia	S2015R
						Iceland	A2001T
						Belgium	M2096R
						China, Guangdong,India	P2079L
						Netherlands	P2055S
						Shanghai	S2083I
						USA	E2053D
						USA	K2143R
						USA	P2144L
						USA	T2124I
						India	P2144S
						China	S2185I
						Netherlands	N2187T
						Shenzhen	T2174S
						Shenzhen	I2190S
						Shenzhen	P2194T
						Switzerland	A;2199V
						USA	T2183I
						Wuhan	G2251S
						Wuhan	L2235I
						Wuhan	I2244T
						Wales	S2242F
						USA, Netherlands, Iceland, Australia	A2249V
						Italy	I2231L
						England	S2237I
						England	V2238I
						China	T2300I
						Shanghai	S2293R
						USA	N2272D
						Shanghai	A2325V
						Shandong	A2345V
						Denmark	P2376L
						USA	S2517F
						Wuhan	G2534V
						Wuhan	D2579A
						Japan	V2580A
						Iceland	N2603D
						Japan	S2625F
						Shenzhen	L2609H
						USA	M2606I
						Jiangsu	C2670Y
						Australia	L2688F
						Slovakia	Q2702H
						Wuhan	N2708S
						Kuwait, Canada, Australia	M2796I
						France	M2796V
						Congo	M2796L
						USA	D2835N
						USA	I2806V
						Shanghai	F2884C
						Peru	N2894D
						Iceland	L2882F
						Germany	T2872M
						Wuhan	F2908I
						USA	S2972F
						Japan	G2959D
						Pakistan	P2965L
						Spain	D2980G
					nsp5	Shanghai	A 3023 V
						Shanghai	I3035 M
						Shanghai	T3058 S
						Belgium	T3058 I
						USA, Japan	A3070 V
						USA, Spain, Shanghai, Netherlands, Georgia, France, Brazil	F3071 Y
						Taiwan, Germany	G3072 C
						Australia	E3073 G
						Taiwan	H3076 Y
						Wuhan	T3090 I
						Shenzhen	S3099 L
						USA	C3147 L
						Australia	Y3160 H
						Shanghai	A3209 S
						USA	A3220 V
						USA	A3229 V
						Honk Kong	H3233 Y
						Australia	T3258 I
						Denmark, Iceland	G3278 S
						Germany	G 3334 S
						Georgia, USA	L3352, F
						Iceland, Shanghai	K3353 R
						Netherlands	V3420 I
						USA	A3436 V
						Iceland	T3459 M
						USA	L3483 F
						France	T3488 I
						USA	Y3500 H
						USA	A3518 V
					nsp6	USA	V3593 F
						Australia	L3602 F
						Australia, Belgium, Brazil, Canada, Congo, England, Finland, France, Georgia, Germany, Hangzhou, Hong Kong, Iceland, Italy, Japan, Malaysia, Netherlands, Norway,Pakistan, Portugal, Saudi Arabia, Scotland, Shanghai, Singapore, south Korea, Spain, Switzerland, Taiwan, USA, Wales, Yunnan	L3606 F
						Netherlands	A3615 V
						Japan	C3682 F
						Iceland	A3686 V
						Belgium	T3716 I
						Shanghai, Chiana	Y3722 C
						Netherlands	N3725 D
						Portugal	L3754 F
						USA	I3758 T
						Japan	E3764 D
						Australia	C 3790 F
						Spain	T 3791 F
						USA	L 3829 F
						Wuhan	N 3833 K
					nsp8	Nan Chang	S 3884 L
						France	Q 3890 H
						USA	S 3949 N
						Iceland	A 3958 V
						Wuhan	T 3959 H
						England	A 3995 V
						Wuhan	M 4029 L
						Switzerland	T 4031 I
						Shenzhen	L 4111 H
					nsp9	France	S 4153 P
						USA	L 4182 F
						France	G 4201 R
						USA	T 4217 I
						Russia	G 4244 R
					nsp10	Netherlands	A 4285 V
						Switzerland	T 4304 I
						Iceland	D 4317 E
						Sweden	F 4321 L
						Netherlands	L 4365 F
						Iceland	T 4371 N
						Belgium	C 4381 W
					nsp12	Iceland	S 4398 L
						USA	G 4416 Y
						Belgium	T 4417 I
						Jiangsu	G 4435 V
						Guangdong	T 4476 I
						Portugal	K 4482 R
						USA, Saudi Arabia, Malaysia, Australia	A 4488 V
						USA	K 4494 R
						USA	M 4501 V
						Switzerland	T 4532 I
						USA	D 4545 G
						Malaysia	G 4570 S
						Australia	G 4619 C
						USA	S 4620 N
						USA	K 4654 N
						Australia, Belgium, Chile, Congo, Czech Republic, Denmark, England, Finland, France, Georgia, Germany, Hungary, Iceland, Italy, Japan, Luxemburg, Mexico, Netherlands, New Zealand, Peru ,Portugal,Russia, Saudi Arabia, Scotland, Spain, Switzerland, Taiwan, USA, Vietnam, Wales	P 4714 L
						USA	A 4791 S
						Netherlands	V 4796 F
						India	A 4797 V
						China	A 4834 V
						USA	A 4840 V
						USA, Iceland	I 4857 V
						Iceland	N 4880 V
						South Korea	A4917 V
						Congo	M5059I
						Georgia	R5031H
						USA	N5125T
						USA	G5165S
						Netherlands	A5047V
						Netherlands	D5270Y
						Japan	G5214S
						Iceland	T5197I
						Iceland	D5195Y
						France	K5198R
						Iceland	H5263Y
					nsp13	Netherlands, USA	V5372I
						Netherlands	K5396A
						Netherlands	S5397A
						Guangdong	S5423I
						China	S5403G
						USA	V5492F
						Hangzou	D5527Y
						Beijing	L5579F
						Beijing	I5650V
						Iceland	V5533I
						USA	V5549L
						India	T5537I
						Iceland, South Korea	H5613Y
						South Korea	A5619T
						Iceland, Shanghai	A5561L
						USA	V5570F
						USA	T5578I
						USA	Q5598K
						USA	P5687S
						Shanghai	A5702V
						USA	R5715C
						USA	T5736I
						Australia	N5826L
						Iceland	I5755T
						Portugal, Spain, USA	S5791L
						Iceland, USA (huge)	P5827L
						Singapore	V5819A
						Australia, Canada, Iceland (huge), USA (huge)	Y5864C
						USA	T5873A
						Netherlands	A5921V
					nsp14	USA	S5952G
						USA	G5961V
						Iceland	G5983C
						France	R6000L
						USA	P6045L
						Congo, England	I6074T
						Guangdong	L6101F
						Japan, Denmark	T6130I
						Netherlands	C6132F
						France	T6139A
						China	C6140F
						USA	F6141Y
						USA, New Zealand	F6157L
						Chile	V6214F
						Australia, France	P6221S
						NanChang	A6244V
						USA	L6290F
						USA	D6303A
						Sichuan	F6308Y
						Portugal	P6336S
						Iceland	P6375L
						Canada	A6406V
						Belgium, Shanghai	L6417F
						USA	M6425I
						Taiwan	S6427L
						China	T6448I
						Congo	S6452C
					nsp15	USA	N6455K
						USA	V6460F
						France, New Zealand, USA	V6473L
						Guangdong	N6480D
						Iceland	T6484I
						Australia	A6532V
						Hangzou	K6560E
						Shenzhen	E6564D
						USA	T6565M
						Netherlands	T6595I
						Kuwait	S6598C
						USA	E6621K
						Belgium	A6622V
						France	A6622I
						France	P6656L
						Wales, England	A6668V
						Netherland, Iceland	D6670N
						USA	F6672L
						Iceland	E6674G
						Shenzhen	F6683Y
						Shanghai	D6690N
						Shanghai	A6706S
						Switzerland, Portugal	E6711K
						Congo	S6712L
						Iceland	D6718Y
						England	D6723Y
						Shanghai	V6754F
						USA	S6763F
					nsp16	Shanghai	P6809S
						Japan	M6814I
						Japan	T6832I
						France	G6874R
						Wuhan	D7017N
						Spain	R7029G
						USA	S7038F
						USA	S7040F
